# Supplementary material for: Mn2+-Based narrow-band green-emitting Cs3MnBr5 phosphor and the performance optimization by Zn2+ alloying
Source: Royal Society of Chemistry journal article supplement (doi:10.1039/c9tc04127c), 2019-01-01
Supplement: c9tc04127c1.pdf [file c9tc04127c1.pdf]

## Electronic supplementary information

### **Mn<sup>2+</sup>-Based Narrow-Band Green-Emitting Cs<sub>3</sub>MnBr<sub>5</sub> Phosphor and the Performance Optimization by Zn<sup>2+</sup> Alloying**

Binbin Su<sup>a</sup>, Maxim Molokeev<sup>cde</sup>, Zhiguo Xia<sup>\*a</sup>

a. State Key Laboratory of Luminescent Materials and Devices and Institute of Optical Communication Materials, South China University of Technology, Guangzhou 510641, China.

b. Laboratory of Crystal Physics, Kirensky Institute of Physics, Federal Research Center KSC SB RAS, Krasnoyarsk 660036, Russia

c. Siberian Federal University, Krasnoyarsk 660041, Russia

d. Department of Physics, Far Eastern State Transport University, Khabarovsk 680021 Russia

**Table 1.** Main parameters of processing and refinement of the Cs<sub>3</sub>MnBr<sub>5</sub> sample

| Compound                    | Cs <sub>3</sub> MnBr <sub>5</sub> |
|-----------------------------|-----------------------------------|
| Sp.Gr.                      | <i>I4/mcm</i>                     |
| <i>a</i> , Å                | 9.60672 (13)                      |
| <i>c</i> , Å                | 15.5716 (2)                       |
| <i>V</i> , Å <sup>3</sup>   | 1437.08 (4)                       |
| <i>Z</i>                    | 2                                 |
| 2θ-interval, °              | 10-105                            |
| <i>R</i> <sub>wp</sub> , %  | 5.13                              |
| <i>R</i> <sub>p</sub> , %   | 3.84                              |
| <i>R</i> <sub>exp</sub> , % | 2.31                              |
| χ <sup>2</sup>              | 2.21                              |
| <i>R</i> <sub>B</sub> , %   | 3.08                              |

**Table S2.** Fractional atomic coordinates and isotropic displacement parameters (Å<sup>2</sup>) of Cs<sub>3</sub>MnBr<sub>5</sub>

|     | <i>x</i>     | <i>y</i>     | <i>z</i>     | <i>B</i> <sub>iso</sub> |
|-----|--------------|--------------|--------------|-------------------------|
| Cs1 | 0.16040 (14) | 0.66040 (14) | 0.5          | 2.5 (2)                 |
| Cs2 | 0            | 0            | 0.25         | 3.0 (2)                 |
| Mn1 | 0            | 0.5          | 0.25         | 1.3 (3)                 |
| Br1 | 0.14742 (16) | 0.64742 (16) | 0.15389 (11) | 3.0 (2)                 |
| Br2 | 0            | 0            | 0            | 2.3 (2)                 |

**Table S3.** Main bond lengths (Å) of Cs<sub>3</sub>MnBr<sub>5</sub>

|                        |             |                       |             |
|------------------------|-------------|-----------------------|-------------|
| Cs1—Br1 <sup>i</sup>   | 3.8082 (19) | Cs2—Br1 <sup>iv</sup> | 3.9646 (16) |
| Cs1—Br1 <sup>ii</sup>  | 3.5439 (19) | Cs2—Br2               | 3.8929 (1)  |
| Cs1—Br2 <sup>iii</sup> | 3.6080 (13) | Mn1—Br1               | 2.5002 (16) |

Symmetry codes: (i) -*x*, *y*, -*z*+1/2; (ii) -*y*+1, -*x*+1, -*z*+1/2; (iii) -*x*, *y*+1, -*z*+1/2; (iv) *x*, *y*-1, *z*; (v) -*x*, *y*, *z*+1/2.

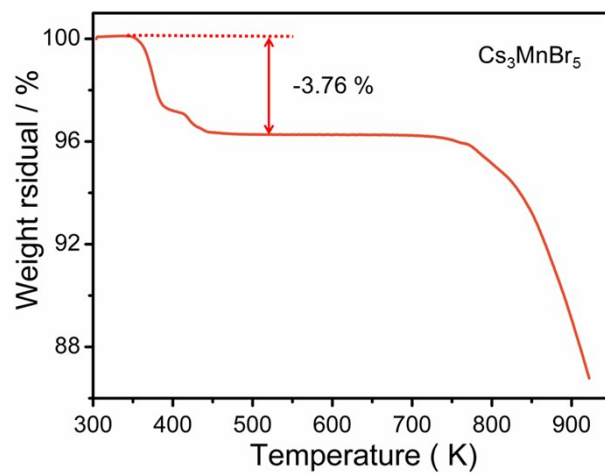

**Fig. S1** The TG curve of  $\text{Cs}_3\text{MnBr}_5$  sample.
